# Supplementary material for: Alkaloid binding to opium poppy major latex proteins triggers structural modification and functional aggregation
Source: PubMed Central journal article supplement (PMC9646721; doi:10.1038/s41467-022-34313-6), 2022-11-09
Supplement: 41467_2022_34313_MOESM2_ESM.pdf [file 41467_2022_34313_MOESM2_ESM.pdf]

## **Description of Additional Supplementary Files**

**Supplementary Data 1:** Composition and relative abundance of specific proteins in gradient fractions were determined using comparative shotgun proteomics.

**Supplementary Data 2:** Nucleotide sequences of the pTRV2-GFP vector and the pPR10 insert used for virus-induced gene silencing experiments.
